# Supplementary material for: Management of Acute Radiodermatitis in Non-Melanoma Skin Cancer Patients Using Electrospun Nanofibrous Patches Loaded with Pinus halepensis Bark Extract
Source: MDPI journal article supplement (doi:10.3390/cancers13112596), 2021-05-26
Supplement: s1 [file s1]

# Management of Acute Radiodermatitis in Non-Melanoma Skin Cancer Patients Using Electrospun Nanofibrous Patches Loaded with *Pinus halepensis* Bark Extract

Aikaterini Kyritsi <sup>1</sup>, Stefanos Kikionis <sup>2</sup>, Anna Tagka <sup>3</sup>, Nikolaos Koliarakis <sup>3</sup>, Antonia Evangelatou <sup>3</sup>, Panagiotis Papagiannis <sup>3</sup>, Alexandros Stratigos <sup>3</sup>, Vangelis Karalis <sup>1</sup>, Paraskevas Dallas <sup>1</sup>, Andreas Vitsos <sup>1</sup>, Efstathia Ioannou <sup>2</sup>, Vassilios Roussis <sup>2,\*</sup> and Michail Rallis <sup>1,\*</sup>

<sup>1</sup> Section of Pharmaceutical Technology, Department of Pharmacy, School of Health Sciences, National and Kapodistrian University of Athens, Panepistimiopolis Zografou, Athens 15784, Greece; katerinakyr18394@gmail.com (A.K.); vkaralis@pharm.uoa.gr (V.K.); dallas@pharm.uoa.gr (P.D.); avitsos@yahoo.gr (A.V.)

<sup>2</sup> Section of Pharmacognosy and Chemistry of Natural Products, Department of Pharmacy, School of Health Sciences, National and Kapodistrian University of Athens, Panepistimiopolis Zografou, Athens 15771, Greece; skikionis@pharm.uoa.gr (S.K.); eioannou@pharm.uoa.gr (E.I.)

<sup>3</sup> First Department of Dermatology-Venereology, National and Kapodistrian University of Athens, Andreas Syggros Hospital, 5 Ionos Dragoumi Str., Athens 11621, Greece; annatagka@gmail.com (A.T.); nkoliarakis@yahoo.gr (N.K.); antevagelatou@gmail.com (A.E.); PPaPagi@med.uoa.gr (P.P.); alstrat2@gmail.com (A.S.)

\* Correspondence: roussis@pharm.uoa.gr (V.R.); rallis@pharm.uoa.gr (M.R.); Tel.: +30-210-7274592 (V.R.); +30-210-7274699 (M.R.)

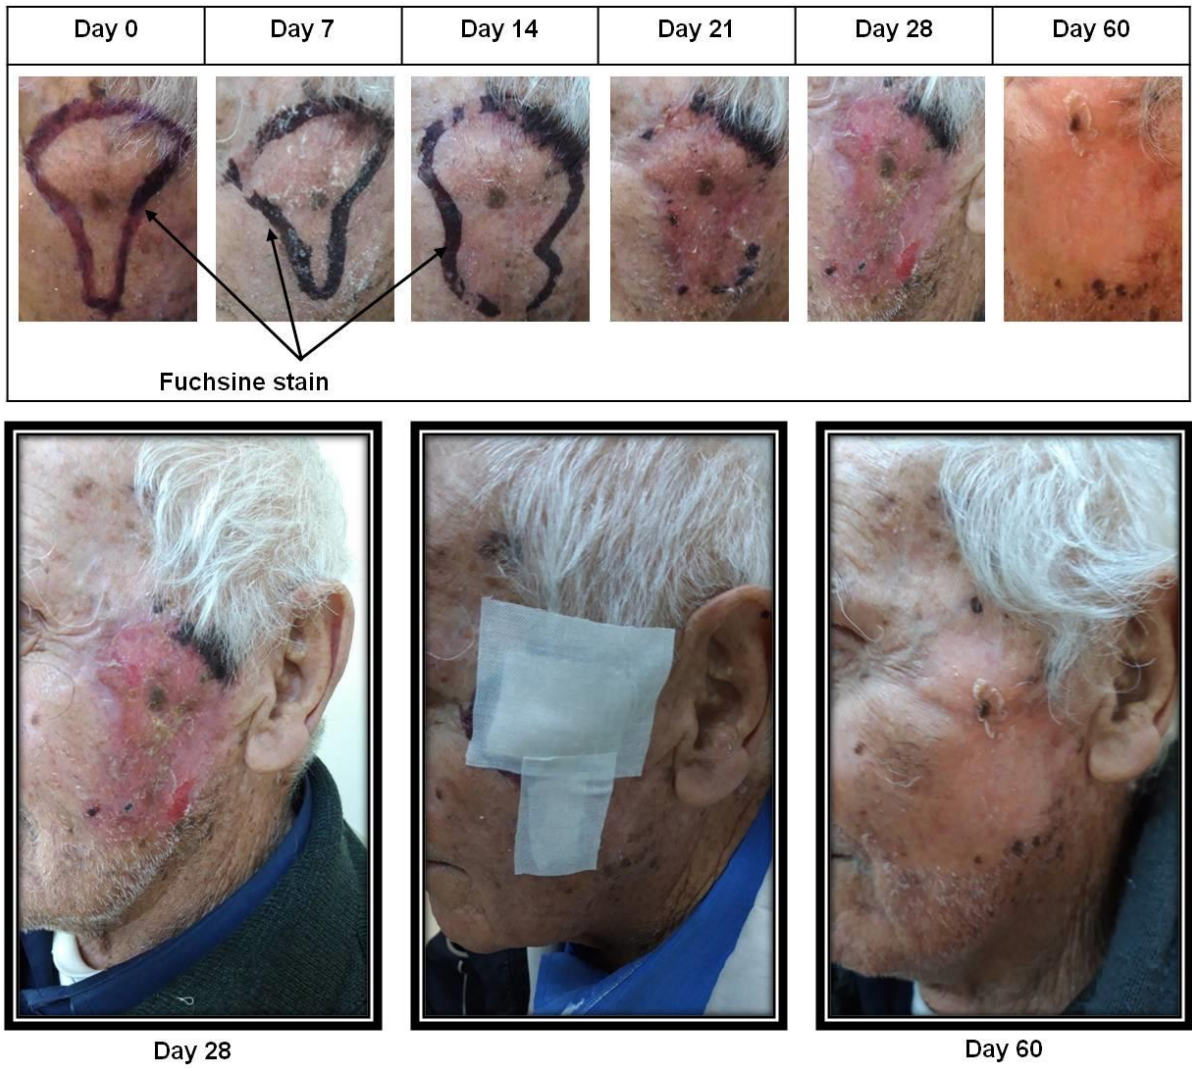

**Figure S1.** Application of the PHBE patch on a representative patient enrolled in the study.

| Patient | Day 0                                                                               | Day 7                                                                               | Day 14                                                                              | Day 21                                                                               | Day 28                                                                                | Day 60                                                                                |
|---------|-------------------------------------------------------------------------------------|-------------------------------------------------------------------------------------|-------------------------------------------------------------------------------------|--------------------------------------------------------------------------------------|---------------------------------------------------------------------------------------|---------------------------------------------------------------------------------------|
| (1)     | 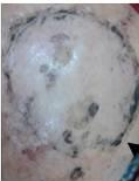   |    |    |    |    |    |
|         |                                                                                     | Fuchsine stain                                                                      |                                                                                     | Irritant Contact Dermatitis                                                          |                                                                                       |                                                                                       |
| (2)     |    |    |    |    |    |    |
|         |                                                                                     | Fuchsine stain                                                                      |                                                                                     |                                                                                      |                                                                                       |                                                                                       |
| (3)     |   |   |   |   |   |   |
|         |                                                                                     | Fuchsine stain                                                                      |                                                                                     |                                                                                      |                                                                                       |                                                                                       |
| (4)     |  |  |  |  |  |  |
|         |                                                                                     | Fuchsine stain                                                                      |                                                                                     |                                                                                      |                                                                                       |                                                                                       |
| (5)     |  |  |  |  |  |  |
|         |                                                                                     | Fuchsine stain                                                                      |                                                                                     |                                                                                      |                                                                                       |                                                                                       |
| (6)     |  |  |  |  |  |  |
|         |                                                                                     | Fuchsine stain                                                                      |                                                                                     |                                                                                      |                                                                                       |                                                                                       |

**Figure S2.** Images of all patients treated with PHBE patch, during days 7, 14, 21, and 28, and one month after RT (day 60).

| Patient | Day 0                                                                               | Day 7                                                                               | Day 14                                                                              | Day 21                                                                               | Day 28                                                                                | Day 60                                                                                |
|---------|-------------------------------------------------------------------------------------|-------------------------------------------------------------------------------------|-------------------------------------------------------------------------------------|--------------------------------------------------------------------------------------|---------------------------------------------------------------------------------------|---------------------------------------------------------------------------------------|
| (7)     |    |    |    |    |    |    |
|         | Acute Radiodermatitis                                                               |                                                                                     |                                                                                     |                                                                                      |                                                                                       |                                                                                       |
| (8)     |    |    |    |    |    |    |
|         | Fuchsine stain                                                                      |                                                                                     | Acute Radiodermatitis                                                               |                                                                                      |                                                                                       |                                                                                       |
| (9)     |   |   |   |   |   |   |
|         | Fuchsine stain                                                                      |                                                                                     | Acute Radiodermatitis                                                               |                                                                                      |                                                                                       |                                                                                       |
| (10)    |  |  |  |  |  |  |
|         | Acute Radiodermatitis                                                               |                                                                                     |                                                                                     |                                                                                      |                                                                                       |                                                                                       |
| (11)    |  |  |  |  |  |  |
|         | Fuchsine stain                                                                      |                                                                                     | Acute Radiodermatitis                                                               |                                                                                      |                                                                                       |                                                                                       |
| (12)    |  |  |  |  |  |  |
|         | Acute Radiodermatitis                                                               |                                                                                     |                                                                                     |                                                                                      |                                                                                       |                                                                                       |

**Figure S3.** Images of all patients treated with the reference product, during days 7, 14, 21, and 28, and one month after RT (day 60).

| Patient | Day 0                                                                               | Day 7                                                                               | Day 14                                                                              | Day 21                                                                               | Day 28                                                                                | Day 60                                                                                |
|---------|-------------------------------------------------------------------------------------|-------------------------------------------------------------------------------------|-------------------------------------------------------------------------------------|--------------------------------------------------------------------------------------|---------------------------------------------------------------------------------------|---------------------------------------------------------------------------------------|
| (1)     | 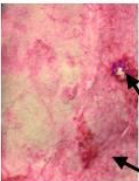   |    |    |    |    |    |
|         | Fuchsine stain                                                                      |                                                                                     | Irritant Contact Dermatitis                                                         |                                                                                      |                                                                                       |                                                                                       |
| (2)     |    |    |    |    |    |    |
|         | Fuchsine stain                                                                      |                                                                                     |                                                                                     |                                                                                      |                                                                                       |                                                                                       |
| (3)     |   |   |   |   |   |   |
|         | Fuchsine stain                                                                      |                                                                                     |                                                                                     |                                                                                      |                                                                                       |                                                                                       |
| (4)     |  |  |  |  |  |  |
|         | Fuchsine stain                                                                      |                                                                                     |                                                                                     |                                                                                      |                                                                                       |                                                                                       |
| (5)     |  |  |  |  |  |  |
|         | Fuchsine stain                                                                      |                                                                                     |                                                                                     |                                                                                      |                                                                                       |                                                                                       |
| (6)     |  |  |  |  |  |  |
|         | Fuchsine stain                                                                      |                                                                                     |                                                                                     |                                                                                      |                                                                                       |                                                                                       |

**Figure S4.** Antera 3D images of all patients treated with PHBE patch, during days 7, 14, 21, and 28, and one month after RT (day 60).

| Patient | Day 0                                                                               | Day 7                                                                               | Day 14                                                                              | Day 21                                                                               | Day 28                                                                                | Day 60                                                                                |
|---------|-------------------------------------------------------------------------------------|-------------------------------------------------------------------------------------|-------------------------------------------------------------------------------------|--------------------------------------------------------------------------------------|---------------------------------------------------------------------------------------|---------------------------------------------------------------------------------------|
| (7)     |    |    |    |    |    |    |
|         | Acute Radiodermatitis                                                               |                                                                                     |                                                                                     |                                                                                      |                                                                                       |                                                                                       |
| (8)     |    |    |    |    |    |    |
|         | Acute Radiodermatitis                                                               |                                                                                     |                                                                                     |                                                                                      |                                                                                       |                                                                                       |
| (9)     |   |   |   |   |   |   |
|         | Fuchsine stain                                                                      | Acute Radiodermatitis                                                               |                                                                                     |                                                                                      |                                                                                       |                                                                                       |
| (10)    |  |  |  |  |  |  |
|         | Acute Radiodermatitis                                                               |                                                                                     |                                                                                     |                                                                                      |                                                                                       |                                                                                       |
| (11)    |  |  |  |  |  |  |
|         | Fuchsine stain                                                                      | Acute Radiodermatitis                                                               |                                                                                     |                                                                                      |                                                                                       |                                                                                       |
| (12)    |  |  |  |  |  |  |
|         | Acute Radiodermatitis                                                               |                                                                                     |                                                                                     |                                                                                      |                                                                                       |                                                                                       |

**Figure S5.** Antera 3D images of all patients treated with the reference product, during days 7, 14, 21, and 28, and one month after RT (day 60).
